# Supplementary material for: Exploration of Metabolic Biomarkers Linking Red Meat Consumption to Ischemic Heart Disease Mortality in the UK Biobank
Source: MDPI journal article supplement (doi:10.3390/nu15081865), 2023-04-13

## Supplementary Tables and Figures

|                                                                                                                                                              |    |
|--------------------------------------------------------------------------------------------------------------------------------------------------------------|----|
| Supplementary Table S1. Association of meat consumption and IHD.....                                                                                         | 2  |
| Supplementary Table S2. Distribution of 167 metabolic biomarkers.....                                                                                        | 3  |
| Supplementary Table S3: Overall association of 167 metabolic biomarkers with ischemic heart disease .....                                                    | 7  |
| Supplementary Table S4: Association of 10 metabolic biomarkers with red meat consumption and with ischemic heart disease in women.....                       | 11 |
| Supplementary Figure S1: Flow chart of eligible study participants in analyses .....                                                                         | 12 |
| Supplementary Figure S2: Association of all metabolic biomarkers with unprocessed red meat and processed meat consumption (please see the separate pdf file) |    |

**Supplementary Table S1. Association of meat consumption and IHD**

|                                  | <b>OR, 95%<br/>CI overall</b> | <b>p overall</b> | <b>OR, 95%<br/>CI men</b> | <b>p men</b> | <b>OR, 95%<br/>CI women</b> | <b>p women</b> |
|----------------------------------|-------------------------------|------------------|---------------------------|--------------|-----------------------------|----------------|
| Unprocessed red meat consumption | 1.04 (1.02, 1.07)             | 0.0007           | 1.05 (1.02, 1.07)         | 0.00042      | 1.01 (0.95, 1.08)           | 0.69           |
| Processed meat consumption       | 1.05 (1.02, 1.07)             | 0.0005           | 1.05 (1.02, 1.07)         | 0.00042      | 1.01 (0.94, 1.09)           | 0.73           |

Footnote: Multivariable logistic regression adjusted for age, sex, ethnicity, TDI, education, physical activity, smoking status and alcohol status, medications use, and baseline disease status was used

**Supplementary Table S2. Distribution of 167 metabolic biomarkers**

| <b>Metabolites</b>                                                            | <b>Mean</b> | <b>SD</b> |
|-------------------------------------------------------------------------------|-------------|-----------|
| X3 Hydroxybutyrate                                                            | 5.78E-02    | 5.89E-02  |
| Acetate                                                                       | 1.68E-02    | 3.25E-02  |
| Acetoacetate                                                                  | 1.26E-02    | 1.21E-02  |
| Acetone                                                                       | 1.42E-02    | 5.55E-03  |
| Glutamine                                                                     | 5.30E-01    | 7.96E-02  |
| Histidine                                                                     | 6.42E-02    | 1.04E-02  |
| Glycine                                                                       | 1.62E-01    | 6.38E-02  |
| Alanine                                                                       | 2.96E-01    | 7.64E-02  |
| Leucine                                                                       | 1.01E-01    | 2.77E-02  |
| Isoleucine                                                                    | 4.98E-02    | 1.75E-02  |
| Valine                                                                        | 2.03E-01    | 4.19E-02  |
| Phenylalanine                                                                 | 4.50E-02    | 1.08E-02  |
| Tyrosine                                                                      | 6.14E-02    | 1.39E-02  |
| Total Concentration of Branched Chain Amino Acids (Leucine+Isoleucine+Valine) | 3.53E-01    | 8.38E-02  |
| Apolipoprotein A1                                                             | 1.44E+00    | 2.41E-01  |
| Apolipoprotein B                                                              | 8.40E-01    | 1.99E-01  |
| Average Diameter for HDL Particles                                            | 9.64E+00    | 2.35E-01  |
| Average Diameter for LDL Particles                                            | 2.39E+01    | 8.80E-02  |
| Average Diameter for VLDL Particles                                           | 3.86E+01    | 1.34E+00  |
| Total Concentration of Lipoprotein Particles                                  | 1.66E-02    | 2.52E-03  |
| Total Lipids in Chylomicrons and Extremely Large VLDL                         | 2.31E-01    | 2.06E-01  |
| Total Lipids in HDL                                                           | 2.98E+00    | 6.37E-01  |
| Total Lipids in IDL                                                           | 1.22E+00    | 2.88E-01  |
| Total Lipids in LDL                                                           | 2.45E+00    | 5.93E-01  |
| Total Lipids in Large HDL                                                     | 6.45E-01    | 3.22E-01  |
| Total Lipids in Large LDL                                                     | 1.56E+00    | 3.74E-01  |
| Total Lipids in Large VLDL                                                    | 3.28E-01    | 1.75E-01  |
| Total Lipids in Lipoprotein Particles                                         | 8.75E+00    | 1.64E+00  |
| Total Lipids in Medium HDL                                                    | 1.02E+00    | 2.23E-01  |
| Total Lipids in Medium LDL                                                    | 6.10E-01    | 1.63E-01  |
| Total Lipids in Medium VLDL                                                   | 5.67E-01    | 2.04E-01  |
| Total Lipids in Small HDL                                                     | 1.15E+00    | 1.56E-01  |
| Total Lipids in Small LDL                                                     | 2.81E-01    | 6.45E-02  |
| Total Lipids in Small VLDL                                                    | 4.08E-01    | 1.29E-01  |
| Total Lipids in VLDL                                                          | 2.09E+00    | 8.56E-01  |
| Total Lipids in Very Large HDL                                                | 1.68E-01    | 7.95E-02  |
| Total Lipids in Very Large VLDL                                               | 2.03E-01    | 1.34E-01  |
| Total Lipids in Very Small VLDL                                               | 3.58E-01    | 8.83E-02  |
| Free Cholesterol in Chylomicrons and Extremely Large VLDL                     | 2.54E-02    | 1.95E-02  |
| Free Cholesterol in HDL                                                       | 2.90E-01    | 7.29E-02  |

|                                                                  |          |          |
|------------------------------------------------------------------|----------|----------|
| Free Cholesterol in IDL                                          | 2.19E-01 | 5.62E-02 |
| Free Cholesterol in LDL                                          | 4.58E-01 | 1.20E-01 |
| Free Cholesterol in Large HDL                                    | 6.68E-02 | 3.75E-02 |
| Free Cholesterol in Large LDL                                    | 2.92E-01 | 7.69E-02 |
| Free Cholesterol in Large VLDL                                   | 4.62E-02 | 2.47E-02 |
| Free Cholesterol in Medium HDL                                   | 8.58E-02 | 2.45E-02 |
| Free Cholesterol in Medium LDL                                   | 1.17E-01 | 3.19E-02 |
| Free Cholesterol in Medium VLDL                                  | 7.81E-02 | 2.93E-02 |
| Free Cholesterol in Small HDL                                    | 1.13E-01 | 1.60E-02 |
| Free Cholesterol in Small LDL                                    | 4.88E-02 | 1.24E-02 |
| Free Cholesterol in Small VLDL                                   | 5.80E-02 | 1.87E-02 |
| Free Cholesterol in VLDL                                         | 2.89E-01 | 1.07E-01 |
| Free Cholesterol in Very Large HDL                               | 2.36E-02 | 7.26E-03 |
| Free Cholesterol in Very Large VLDL                              | 2.38E-02 | 1.43E-02 |
| Free Cholesterol in Very Small VLDL                              | 5.78E-02 | 1.48E-02 |
| Concentration of Chylomicrons and Extremely Large VLDL Particles | 1.71E-06 | 1.53E-06 |
| Concentration of HDL Particles                                   | 1.50E-02 | 2.41E-03 |
| Concentration of IDL Particles                                   | 3.08E-04 | 7.63E-05 |
| Concentration of LDL Particles                                   | 1.18E-03 | 2.80E-04 |
| Concentration of Large HDL Particles                             | 1.39E-03 | 7.64E-04 |
| Concentration of Large LDL Particles                             | 7.26E-04 | 1.75E-04 |
| Concentration of Large VLDL Particles                            | 1.02E-05 | 5.50E-06 |
| Concentration of Medium HDL Particles                            | 3.81E-03 | 9.20E-04 |
| Concentration of Medium LDL Particles                            | 2.91E-04 | 7.53E-05 |
| Concentration of Medium VLDL Particles                           | 3.43E-05 | 1.22E-05 |
| Concentration of Small HDL Particles                             | 9.56E-03 | 1.29E-03 |
| Concentration of Small LDL Particles                             | 1.68E-04 | 3.72E-05 |
| Concentration of Small VLDL Particles                            | 3.89E-05 | 1.27E-05 |
| Concentration of VLDL Particles                                  | 1.44E-04 | 4.41E-05 |
| Concentration of Very Large HDL Particles                        | 2.32E-04 | 9.48E-05 |
| Concentration of Very Large VLDL Particles                       | 3.48E-06 | 2.27E-06 |
| Concentration of Very Small VLDL Particles                       | 5.49E-05 | 1.37E-05 |
| Cholesteryl Esters in Chylomicrons and Extremely Large VLDL      | 3.13E-02 | 2.35E-02 |
| Cholesteryl Esters in HDL                                        | 1.01E+00 | 2.53E-01 |
| Cholesteryl Esters in IDL                                        | 6.13E-01 | 1.59E-01 |
| Cholesteryl Esters in LDL                                        | 1.25E+00 | 3.19E-01 |
| Cholesteryl Esters in Large HDL                                  | 2.27E-01 | 1.30E-01 |
| Cholesteryl Esters in Large LDL                                  | 8.20E-01 | 2.06E-01 |
| Cholesteryl Esters in Large VLDL                                 | 5.09E-02 | 2.31E-02 |
| Cholesteryl Esters in Medium HDL                                 | 4.02E-01 | 9.74E-02 |
| Cholesteryl Esters in Medium LDL                                 | 3.01E-01 | 8.66E-02 |
| Cholesteryl Esters in Medium VLDL                                | 9.10E-02 | 3.81E-02 |
| Cholesteryl Esters in Small HDL                                  | 3.25E-01 | 4.67E-02 |

|                                                      |          |          |
|------------------------------------------------------|----------|----------|
| Cholesteryl Esters in Small LDL                      | 1.29E-01 | 3.28E-02 |
| Cholesteryl Esters in Small VLDL                     | 9.73E-02 | 3.29E-02 |
| Cholesteryl Esters in VLDL                           | 4.27E-01 | 1.43E-01 |
| Cholesteryl Esters in Very Large HDL                 | 5.82E-02 | 2.77E-02 |
| Cholesteryl Esters in Very Large VLDL                | 2.98E-02 | 1.46E-02 |
| Cholesteryl Esters in Very Small VLDL                | 1.27E-01 | 3.52E-02 |
| VLDL Cholesterol                                     | 7.17E-01 | 2.46E-01 |
| Clinical LDL Cholesterol                             | 2.51E+00 | 7.27E-01 |
| Cholesterol in Chylomicrons and Extremely Large VLDL | 5.67E-02 | 4.28E-02 |
| Cholesterol in IDL                                   | 8.32E-01 | 2.14E-01 |
| Cholesterol in Large HDL                             | 2.94E-01 | 1.67E-01 |
| Cholesterol in Large LDL                             | 1.11E+00 | 2.81E-01 |
| Cholesterol in Large VLDL                            | 9.72E-02 | 4.71E-02 |
| Cholesterol in Medium HDL                            | 4.88E-01 | 1.21E-01 |
| Cholesterol in Medium LDL                            | 4.18E-01 | 1.16E-01 |
| Cholesterol in Medium VLDL                           | 1.69E-01 | 6.54E-02 |
| Cholesterol in Small HDL                             | 4.39E-01 | 6.03E-02 |
| Cholesterol in Small LDL                             | 1.78E-01 | 4.38E-02 |
| Cholesterol in Small VLDL                            | 1.55E-01 | 5.11E-02 |
| Cholesterol in Very Large HDL                        | 8.18E-02 | 3.47E-02 |
| Cholesterol in Very Large VLDL                       | 5.36E-02 | 2.85E-02 |
| Cholesterol in Very Small VLDL                       | 1.85E-01 | 4.93E-02 |
| LDL Cholesterol                                      | 1.71E+00 | 4.34E-01 |
| HDL Cholesterol                                      | 1.30E+00 | 3.23E-01 |
| Remnant Cholesterol Non HDL Non LDL Cholesterol      | 1.55E+00 | 4.15E-01 |
| Total Cholesterol                                    | 4.56E+00 | 9.36E-01 |
| Total Cholesterol Minus HDL C                        | 3.26E+00 | 8.35E-01 |
| Total Free Cholesterol                               | 1.25E+00 | 2.68E-01 |
| Total Esterified Cholesterol                         | 3.31E+00 | 6.73E-01 |
| Total Fatty Acids                                    | 1.18E+01 | 2.39E+00 |
| Saturated Fatty Acids                                | 4.04E+00 | 9.51E-01 |
| Omega 6 Fatty Acids                                  | 4.45E+00 | 6.81E-01 |
| Linoleic Acid                                        | 3.41E+00 | 6.85E-01 |
| Monounsaturated Fatty Acids                          | 2.82E+00 | 8.19E-01 |
| Docosahexaenoic Acid                                 | 2.34E-01 | 8.28E-02 |
| Polyunsaturated Fatty Acids                          | 4.98E+00 | 8.02E-01 |
| Omega 3 Fatty Acids                                  | 5.26E-01 | 2.19E-01 |
| Citrate                                              | 6.21E-02 | 1.22E-02 |
| Lactate                                              | 3.81E+00 | 1.09E+00 |
| Glucose                                              | 3.57E+00 | 1.14E+00 |
| Pyruvate                                             | 7.83E-02 | 3.26E-02 |
| Phosphatidylcholines                                 | 2.08E+00 | 3.74E-01 |
| Phosphoglycerides                                    | 2.25E+00 | 3.97E-01 |

|                                                        |          |          |
|--------------------------------------------------------|----------|----------|
| Phospholipids in Chylomicrons and Extremely Large VLDL | 3.63E-02 | 3.20E-02 |
| Phospholipids in HDL                                   | 1.54E+00 | 3.17E-01 |
| Phospholipids in IDL                                   | 2.90E-01 | 6.59E-02 |
| Phospholipids in LDL                                   | 5.98E-01 | 1.39E-01 |
| Phospholipids in Large HDL                             | 3.21E-01 | 1.51E-01 |
| Phospholipids in Large LDL                             | 3.53E-01 | 8.20E-02 |
| Phospholipids in Large VLDL                            | 6.59E-02 | 3.91E-02 |
| Phospholipids in Medium HDL                            | 4.82E-01 | 9.96E-02 |
| Phospholipids in Medium LDL                            | 1.59E-01 | 4.15E-02 |
| Phospholipids in Medium VLDL                           | 1.27E-01 | 4.73E-02 |
| Phospholipids in Small HDL                             | 6.55E-01 | 9.23E-02 |
| Phospholipids in Small LDL                             | 8.70E-02 | 1.84E-02 |
| Phospholipids in Small VLDL                            | 9.61E-02 | 2.98E-02 |
| Phospholipids in VLDL                                  | 4.69E-01 | 1.80E-01 |
| Phospholipids in Very Large HDL                        | 7.91E-02 | 4.45E-02 |
| Phospholipids in Very Large VLDL                       | 3.88E-02 | 2.60E-02 |
| Phospholipids in Very Small VLDL                       | 1.05E-01 | 2.62E-02 |
| Sphingomyelins                                         | 4.42E-01 | 7.16E-02 |
| Total Cholines                                         | 2.53E+00 | 4.10E-01 |
| Total Phospholipids in Lipoprotein Particles           | 2.89E+00 | 4.70E-01 |
| Total Triglycerides                                    | 1.30E+00 | 5.73E-01 |
| Triglycerides in Chylomicrons and Extremely Large VLDL | 1.38E-01 | 1.33E-01 |
| Triglycerides in HDL                                   | 1.44E-01 | 4.72E-02 |
| Triglycerides in IDL                                   | 9.90E-02 | 2.60E-02 |
| Triglycerides in LDL                                   | 1.44E-01 | 4.08E-02 |
| Triglycerides in Large HDL                             | 3.01E-02 | 1.21E-02 |
| Triglycerides in Large LDL                             | 9.61E-02 | 2.54E-02 |
| Triglycerides in Large VLDL                            | 1.65E-01 | 9.14E-02 |
| Triglycerides in Medium HDL                            | 5.38E-02 | 1.90E-02 |
| Triglycerides in Medium LDL                            | 3.24E-02 | 1.03E-02 |
| Triglycerides in Medium VLDL                           | 2.70E-01 | 1.14E-01 |
| Triglycerides in Small HDL                             | 5.25E-02 | 1.75E-02 |
| Triglycerides in Small LDL                             | 1.53E-02 | 5.69E-03 |
| Triglycerides in Small VLDL                            | 1.56E-01 | 6.00E-02 |
| Triglycerides in VLDL                                  | 9.09E-01 | 4.80E-01 |
| Triglycerides in Very Large HDL                        | 7.06E-03 | 2.69E-03 |
| Triglycerides in Very Large VLDL                       | 1.11E-01 | 8.16E-02 |
| Triglycerides in Very Small VLDL                       | 6.86E-02 | 2.12E-02 |
| Creatinine                                             | 6.61E-02 | 1.51E-02 |
| Albumin                                                | 3.89E+01 | 3.36E+00 |
| Glycoprotein Acetyls                                   | 7.92E-01 | 1.17E-01 |

Units of NMR metabolomics measurement are mmol/l.

**Supplementary Table S3: Overall association of 167 metabolic biomarkers with ischemic heart disease**

| <b>Metabolites</b>                                     | <b>Estimate</b> | <b>p value</b> | <b>p.fdr</b> |
|--------------------------------------------------------|-----------------|----------------|--------------|
| Glycoprotein Acetyls                                   | 0.213           | 1.43E-08       | 1.19E-06     |
| Albumin                                                | -0.195          | 1.75E-07       | 9.72E-06     |
| Creatinine                                             | 0.087           | 9.82E-07       | 4.10E-05     |
| Triglycerides in Very Small VLDL                       | 0.146           | 5.45E-05       | 1.01E-03     |
| Triglycerides in Very Large VLDL                       | 0.054           | 1.42E-01       | 3.53E-01     |
| Triglycerides in Very Large HDL                        | 0.109           | 2.30E-03       | 2.40E-02     |
| Triglycerides in VLDL                                  | 0.057           | 1.27E-01       | 3.42E-01     |
| Triglycerides in Small VLDL                            | 0.092           | 1.57E-02       | 7.85E-02     |
| Triglycerides in Small LDL                             | 0.104           | 3.06E-03       | 2.84E-02     |
| Triglycerides in Small HDL                             | 0.080           | 4.04E-02       | 1.53E-01     |
| Triglycerides in Medium VLDL                           | 0.042           | 2.75E-01       | 4.79E-01     |
| Triglycerides in Medium LDL                            | 0.140           | 6.51E-05       | 1.09E-03     |
| Triglycerides in Medium HDL                            | 0.033           | 3.99E-01       | 5.62E-01     |
| Triglycerides in Large VLDL                            | 0.036           | 3.37E-01       | 5.26E-01     |
| Triglycerides in Large LDL                             | 0.162           | 5.44E-06       | 1.82E-04     |
| Triglycerides in Large HDL                             | 0.044           | 2.71E-01       | 4.79E-01     |
| Triglycerides in LDL                                   | 0.149           | 2.25E-05       | 4.69E-04     |
| Triglycerides in IDL                                   | 0.159           | 1.04E-05       | 2.48E-04     |
| Triglycerides in HDL                                   | 0.058           | 1.29E-01       | 3.42E-01     |
| Triglycerides in Chylomicrons and Extremely Large VLDL | 0.046           | 1.96E-01       | 4.11E-01     |
| Total Triglycerides                                    | 0.070           | 5.85E-02       | 2.08E-01     |
| Total Phospholipids in Lipoprotein Particles           | -0.025          | 5.56E-01       | 6.83E-01     |
| Total Cholines                                         | -0.045          | 2.86E-01       | 4.83E-01     |
| Sphingomyelins                                         | 0.007           | 8.71E-01       | 9.26E-01     |
| Phospholipids in Very Small VLDL                       | 0.130           | 1.31E-03       | 1.68E-02     |
| Phospholipids in Very Large VLDL                       | 0.057           | 1.38E-01       | 3.53E-01     |
| Phospholipids in Very Large HDL                        | 0.045           | 3.47E-01       | 5.32E-01     |
| Phospholipids in VLDL                                  | 0.067           | 9.46E-02       | 2.98E-01     |
| Phospholipids in Small VLDL                            | 0.063           | 1.27E-01       | 3.42E-01     |
| Phospholipids in Small LDL                             | 0.063           | 1.22E-01       | 3.42E-01     |
| Phospholipids in Small HDL                             | -0.096          | 1.47E-02       | 7.73E-02     |
| Phospholipids in Medium VLDL                           | 0.029           | 4.94E-01       | 6.30E-01     |
| Phospholipids in Medium LDL                            | 0.006           | 8.89E-01       | 9.29E-01     |
| Phospholipids in Medium HDL                            | -0.100          | 1.88E-02       | 8.74E-02     |
| Phospholipids in Large VLDL                            | 0.061           | 1.24E-01       | 3.42E-01     |
| Phospholipids in Large LDL                             | -0.033          | 4.43E-01       | 5.97E-01     |
| Phospholipids in Large HDL                             | -0.045          | 3.64E-01       | 5.38E-01     |
| Phospholipids in LDL                                   | -0.008          | 8.42E-01       | 9.07E-01     |
| Phospholipids in IDL                                   | 0.005           | 9.07E-01       | 9.36E-01     |

|                                                        |        |          |          |
|--------------------------------------------------------|--------|----------|----------|
| Phospholipids in HDL                                   | -0.085 | 6.00E-02 | 2.09E-01 |
| Phospholipids in Chylomicrons and Extremely Large VLDL | 0.048  | 1.97E-01 | 4.11E-01 |
| Phosphoglycerides                                      | -0.035 | 4.00E-01 | 5.62E-01 |
| Phosphatidylcholines                                   | -0.057 | 1.84E-01 | 4.11E-01 |
| Pyruvate                                               | 0.019  | 5.93E-01 | 7.07E-01 |
| Glucose                                                | 0.185  | 5.26E-21 | 8.78E-19 |
| Lactate                                                | 0.025  | 5.11E-01 | 6.47E-01 |
| Citrate                                                | 0.141  | 8.08E-06 | 2.25E-04 |
| Omega 3 Fatty Acids                                    | -0.108 | 1.17E-02 | 6.83E-02 |
| Polyunsaturated Fatty Acids                            | -0.067 | 1.10E-01 | 3.34E-01 |
| Docosahexaenoic Acid                                   | -0.126 | 4.11E-03 | 3.27E-02 |
| Monounsaturated Fatty Acids                            | 0.088  | 1.33E-02 | 7.42E-02 |
| Linoleic Acid                                          | -0.039 | 3.56E-01 | 5.36E-01 |
| Omega 6 Fatty Acids                                    | -0.044 | 2.91E-01 | 4.86E-01 |
| Saturated Fatty Acids                                  | 0.057  | 1.20E-01 | 3.42E-01 |
| Total Fatty Acids                                      | 0.038  | 3.11E-01 | 5.09E-01 |
| Total Esterified Cholesterol                           | -0.050 | 2.46E-01 | 4.71E-01 |
| Total Free Cholesterol                                 | -0.019 | 6.60E-01 | 7.71E-01 |
| Total Cholesterol Minus HDL C                          | -0.011 | 7.93E-01 | 8.77E-01 |
| Total Cholesterol                                      | -0.042 | 3.36E-01 | 5.26E-01 |
| Remnant Cholesterol (Non HDL, Non LDL Cholesterol)     | 0.003  | 9.49E-01 | 9.72E-01 |
| HDL Cholesterol                                        | -0.109 | 2.37E-02 | 1.02E-01 |
| LDL Cholesterol                                        | -0.024 | 5.78E-01 | 6.99E-01 |
| Cholesterol in Very Small VLDL                         | 0.040  | 3.56E-01 | 5.36E-01 |
| Cholesterol in Very Large VLDL                         | 0.051  | 2.10E-01 | 4.32E-01 |
| Cholesterol in Very Large HDL                          | 0.038  | 4.30E-01 | 5.83E-01 |
| Cholesterol in Small VLDL                              | 0.062  | 1.41E-01 | 3.53E-01 |
| Cholesterol in Small LDL                               | 0.002  | 9.61E-01 | 9.78E-01 |
| Cholesterol in Small HDL                               | -0.125 | 1.57E-03 | 1.88E-02 |
| Cholesterol in Medium VLDL                             | -0.007 | 8.78E-01 | 9.28E-01 |
| Cholesterol in Medium LDL                              | -0.017 | 6.91E-01 | 7.95E-01 |
| Cholesterol in Medium HDL                              | -0.130 | 3.63E-03 | 3.03E-02 |
| Cholesterol in Large VLDL                              | 0.049  | 2.29E-01 | 4.59E-01 |
| Cholesterol in Large LDL                               | -0.030 | 4.78E-01 | 6.17E-01 |
| Cholesterol in Large HDL                               | -0.049 | 3.35E-01 | 5.26E-01 |
| Cholesterol in IDL                                     | -0.051 | 2.52E-01 | 4.74E-01 |
| Cholesterol in Chylomicrons and Extremely Large VLDL   | 0.050  | 1.90E-01 | 4.11E-01 |
| Clinical LDL Cholesterol                               | -0.034 | 4.23E-01 | 5.78E-01 |
| VLDL Cholesterol                                       | 0.045  | 2.84E-01 | 4.83E-01 |
| Cholesteryl Esters in Very Small VLDL                  | 0.014  | 7.60E-01 | 8.46E-01 |
| Cholesteryl Esters in Very Large VLDL                  | 0.046  | 2.72E-01 | 4.79E-01 |
| Cholesteryl Esters in Very Large HDL                   | 0.024  | 6.19E-01 | 7.33E-01 |
| Cholesteryl Esters in VLDL                             | 0.037  | 3.88E-01 | 5.54E-01 |



|                                                                  |        |          |          |
|------------------------------------------------------------------|--------|----------|----------|
| Cholesteryl Esters in Small VLDL                                 | 0.076  | 7.40E-02 | 2.42E-01 |
| Cholesteryl Esters in Small LDL                                  | 0.009  | 8.37E-01 | 9.07E-01 |
| Cholesteryl Esters in Small HDL                                  | -0.147 | 1.99E-04 | 3.03E-03 |
| Cholesteryl Esters in Medium VLDL                                | -0.027 | 5.34E-01 | 6.67E-01 |
| Cholesteryl Esters in Medium LDL                                 | -0.009 | 8.19E-01 | 8.94E-01 |
| Cholesteryl Esters in Medium HDL                                 | -0.137 | 2.18E-03 | 2.40E-02 |
| Cholesteryl Esters in Large VLDL                                 | 0.043  | 3.05E-01 | 5.04E-01 |
| Cholesteryl Esters in Large LDL                                  | -0.023 | 5.89E-01 | 7.07E-01 |
| Cholesteryl Esters in Large HDL                                  | -0.056 | 2.65E-01 | 4.79E-01 |
| Cholesteryl Esters in LDL                                        | -0.016 | 6.99E-01 | 7.95E-01 |
| Cholesteryl Esters in IDL                                        | -0.059 | 1.84E-01 | 4.11E-01 |
| Cholesteryl Esters in HDL                                        | -0.123 | 1.05E-02 | 6.83E-02 |
| Cholesteryl Esters in Chylomicrons and Extremely Large VLDL      | 0.057  | 1.41E-01 | 3.53E-01 |
| Concentration of Very Small VLDL Particles                       | 0.100  | 1.60E-02 | 7.85E-02 |
| Concentration of Very Large VLDL Particles                       | 0.060  | 1.19E-01 | 3.42E-01 |
| Concentration of Very Large HDL Particles                        | 0.056  | 2.31E-01 | 4.59E-01 |
| Concentration of VLDL Particles                                  | 0.076  | 6.21E-02 | 2.12E-01 |
| Concentration of Small VLDL Particles                            | 0.089  | 2.60E-02 | 1.09E-01 |
| Concentration of Small LDL Particles                             | 0.033  | 4.23E-01 | 5.78E-01 |
| Concentration of Small HDL Particles                             | -0.119 | 2.68E-03 | 2.64E-02 |
| Concentration of Medium VLDL Particles                           | 0.026  | 5.35E-01 | 6.67E-01 |
| Concentration of Medium LDL Particles                            | -0.005 | 9.08E-01 | 9.36E-01 |
| Concentration of Medium HDL Particles                            | -0.121 | 6.41E-03 | 4.87E-02 |
| Concentration of Large VLDL Particles                            | 0.056  | 1.54E-01 | 3.74E-01 |
| Concentration of Large LDL Particles                             | 0.045  | 2.86E-01 | 4.83E-01 |
| Concentration of Large HDL Particles                             | -0.044 | 3.86E-01 | 5.54E-01 |
| Concentration of LDL Particles                                   | 0.031  | 4.61E-01 | 6.06E-01 |
| Concentration of IDL Particles                                   | -0.011 | 8.02E-01 | 8.81E-01 |
| Concentration of HDL Particles                                   | -0.124 | 3.58E-03 | 3.03E-02 |
| Concentration of Chylomicrons and Extremely Large VLDL Particles | 0.051  | 1.63E-01 | 3.83E-01 |
| Free Cholesterol in Very Small VLDL                              | 0.097  | 2.10E-02 | 9.43E-02 |
| Free Cholesterol in Very Large VLDL                              | 0.053  | 1.73E-01 | 4.01E-01 |
| Free Cholesterol in Very Large HDL                               | 0.080  | 7.04E-02 | 2.35E-01 |
| Free Cholesterol in VLDL                                         | 0.053  | 1.95E-01 | 4.11E-01 |
| Free Cholesterol in Small VLDL                                   | 0.038  | 3.74E-01 | 5.47E-01 |
| Free Cholesterol in Small LDL                                    | -0.016 | 7.09E-01 | 8.00E-01 |
| Free Cholesterol in Small HDL                                    | -0.044 | 2.70E-01 | 4.79E-01 |
| Free Cholesterol in Medium VLDL                                  | 0.019  | 6.49E-01 | 7.63E-01 |
| Free Cholesterol in Medium LDL                                   | -0.035 | 4.06E-01 | 5.64E-01 |
| Free Cholesterol in Medium HDL                                   | -0.099 | 2.78E-02 | 1.11E-01 |
| Free Cholesterol in Large VLDL                                   | 0.053  | 1.85E-01 | 4.11E-01 |
| Free Cholesterol in Large LDL                                    | -0.050 | 2.51E-01 | 4.74E-01 |
| Free Cholesterol in Large HDL                                    | -0.021 | 6.69E-01 | 7.76E-01 |

|                                                                                      |        |          |          |
|--------------------------------------------------------------------------------------|--------|----------|----------|
| Free Cholesterol in LDL                                                              | -0.043 | 3.21E-01 | 5.15E-01 |
| Free Cholesterol in IDL                                                              | -0.026 | 5.46E-01 | 6.76E-01 |
| Free Cholesterol in HDL                                                              | -0.053 | 2.67E-01 | 4.79E-01 |
| Free Cholesterol in Chylomicrons and Extremely Large VLDL                            | 0.042  | 2.69E-01 | 4.79E-01 |
| Total Lipids in Very Small VLDL                                                      | 0.104  | 1.19E-02 | 6.83E-02 |
| Total Lipids in Very Large VLDL                                                      | 0.055  | 1.47E-01 | 3.61E-01 |
| Total Lipids in Very Large HDL                                                       | 0.048  | 3.16E-01 | 5.12E-01 |
| Total Lipids in VLDL                                                                 | 0.059  | 1.29E-01 | 3.42E-01 |
| Total Lipids in Small VLDL                                                           | 0.084  | 3.77E-02 | 1.46E-01 |
| Total Lipids in Small LDL                                                            | 0.031  | 4.47E-01 | 5.98E-01 |
| Total Lipids in Small HDL                                                            | -0.096 | 1.48E-02 | 7.73E-02 |
| Total Lipids in Medium VLDL                                                          | 0.031  | 4.56E-01 | 6.04E-01 |
| Total Lipids in Medium LDL                                                           | 0.001  | 9.81E-01 | 9.85E-01 |
| Total Lipids in Medium HDL                                                           | -0.110 | 1.15E-02 | 6.83E-02 |
| Total Lipids in Lipoprotein Particles                                                | 0.001  | 9.77E-01 | 9.85E-01 |
| Total Lipids in Large VLDL                                                           | 0.046  | 2.44E-01 | 4.71E-01 |
| Total Lipids in Large LDL                                                            | -0.016 | 7.14E-01 | 8.00E-01 |
| Total Lipids in Large HDL                                                            | -0.044 | 3.79E-01 | 5.50E-01 |
| Total Lipids in LDL                                                                  | -0.006 | 8.90E-01 | 9.29E-01 |
| Total Lipids in IDL                                                                  | -0.017 | 6.99E-01 | 7.95E-01 |
| Total Lipids in HDL                                                                  | -0.090 | 5.21E-02 | 1.89E-01 |
| Total Lipids in Chylomicrons and Extremely Large VLDL                                | 0.047  | 1.91E-01 | 4.11E-01 |
| Total Concentration of Lipoprotein Particles                                         | -0.114 | 7.28E-03 | 5.29E-02 |
| Average Diameter for VLDL Particles                                                  | -0.048 | 1.62E-01 | 3.83E-01 |
| Average Diameter for LDL Particles                                                   | 0.066  | 9.27E-02 | 2.98E-01 |
| Average Diameter for HDL Particles                                                   | 0.009  | 8.62E-01 | 9.22E-01 |
| Apolipoprotein B                                                                     | 0.030  | 4.80E-01 | 6.17E-01 |
| Apolipoprotein A1                                                                    | -0.107 | 1.66E-02 | 7.90E-02 |
| Total Concentration of Branched Chain Amino Acids<br>(Leucine + Isoleucine + Valine) | 0.027  | 4.79E-01 | 6.17E-01 |
| Tyrosine                                                                             | 0.121  | 1.03E-03 | 1.44E-02 |
| Phenylalanine                                                                        | 0.048  | 2.70E-02 | 1.10E-01 |
| Valine                                                                               | 0.036  | 3.60E-01 | 5.36E-01 |
| Isoleucine                                                                           | 0.044  | 2.43E-01 | 4.71E-01 |
| Leucine                                                                              | 0.001  | 9.85E-01 | 9.85E-01 |
| Alanine                                                                              | 0.093  | 9.22E-03 | 6.41E-02 |
| Glycine                                                                              | 0.029  | 5.71E-01 | 6.96E-01 |
| Histidine                                                                            | -0.052 | 2.14E-01 | 4.36E-01 |
| Glutamine                                                                            | 0.036  | 3.44E-01 | 5.32E-01 |
| Acetone                                                                              | 0.047  | 9.97E-02 | 3.08E-01 |
| Acetoacetate                                                                         | 0.067  | 2.15E-02 | 9.43E-02 |
| Acetate                                                                              | 0.040  | 4.52E-02 | 1.68E-01 |
| X3 Hydroxybutyrate                                                                   | 0.079  | 1.11E-02 | 6.83E-02 |

**Supplementary Table S4: Association of 10 metabolic biomarkers with red meat consumption and with ischemic heart disease in women**

**(a) Unprocessed red meat consumption**

| <b>Metabolites</b>                         | <b>Beta,95%<br/>CI meat</b> | <b>p meat</b> | <b>OR,95% CI IHD</b> | <b>p IHD</b> |
|--------------------------------------------|-----------------------------|---------------|----------------------|--------------|
| Concentration of Very Small VLDL Particles | 0.03 (0.02, 0.04)           | 2.19E-15      | 0.96 (0.8, 1.13)     | 6.11E-01     |
| Phospholipids in Very Small VLDL           | 0.03 (0.02, 0.03)           | 6.89E-13      | 0.99 (0.83, 1.17)    | 9.34E-01     |
| Total Lipids in Very Small VLDL            | 0.03 (0.02, 0.04)           | 1.74E-15      | 0.96 (0.81, 1.14)    | 6.84E-01     |
| Triglycerides in IDL                       | 0.02 (0.01, 0.03)           | 8.78E-10      | 1.04 (0.88, 1.23)    | 6.10E-01     |
| Triglycerides in Large LDL                 | 0.02 (0.01, 0.03)           | 1.91E-09      | 1.03 (0.87, 1.22)    | 6.90E-01     |
| Triglycerides in LDL                       | 0.02 (0.01, 0.03)           | 9.16E-09      | 1.03 (0.86, 1.21)    | 7.44E-01     |
| Triglycerides in Medium LDL                | 0.02 (0.01, 0.02)           | 5.13E-07      | 1.02 (0.85, 1.21)    | 7.94E-01     |
| Triglycerides in Small LDL                 | 0.02 (0.01, 0.02)           | 2.22E-07      | 1.01 (0.84, 1.19)    | 9.31E-01     |
| Triglycerides in Very Large HDL            | 0.01 (0, 0.02)              | 2.74E-03      | 0.99 (0.82, 1.16)    | 8.73E-01     |
| Triglycerides in Very Small VLDL           | 0.02 (0.01, 0.03)           | 4.70E-09      | 1.07 (0.9, 1.25)     | 4.40E-01     |

**(b) Processed meat consumption**

| <b>Metabolites</b>                         | <b>Beta,95%<br/>CI meat</b> | <b>p meat</b> | <b>OR,95%<br/>CI IHD</b> | <b>p IHD</b> |
|--------------------------------------------|-----------------------------|---------------|--------------------------|--------------|
| Concentration of Very Small VLDL Particles | 0.02 (0.01, 0.03)           | 3.36E-08      | 0.96 (0.8, 1.13)         | 6.11E-01     |
| Phospholipids in Very Small VLDL           | 0.02 (0.01, 0.03)           | 4.93E-08      | 0.99 (0.83, 1.17)        | 9.34E-01     |
| Total Lipids in Very Small VLDL            | 0.02 (0.01, 0.03)           | 3.72E-08      | 0.96 (0.81, 1.14)        | 6.84E-01     |
| Triglycerides in IDL                       | 0.02 (0.02, 0.03)           | 2.08E-09      | 1.04 (0.88, 1.23)        | 6.10E-01     |
| Triglycerides in Large LDL                 | 0.02 (0.02, 0.03)           | 2.98E-09      | 1.03 (0.87, 1.22)        | 6.90E-01     |
| Triglycerides in LDL                       | 0.03 (0.02, 0.03)           | 4.90E-11      | 1.03 (0.86, 1.21)        | 7.44E-01     |
| Triglycerides in Medium LDL                | 0.03 (0.02, 0.03)           | 6.54E-12      | 1.02 (0.85, 1.21)        | 7.94E-01     |
| Triglycerides in Small LDL                 | 0.03 (0.02, 0.04)           | 7.71E-17      | 1.01 (0.84, 1.19)        | 9.31E-01     |
| Triglycerides in Very Large HDL            | 0.02 (0.01, 0.02)           | 6.49E-05      | 0.99 (0.82, 1.16)        | 8.73E-01     |
| Triglycerides in Very Small VLDL           | 0.03 (0.02, 0.04)           | 2.21E-12      | 1.07 (0.9, 1.25)         | 4.40E-01     |

## Supplementary Figure S1: Flow chart of eligible study participants in analyses

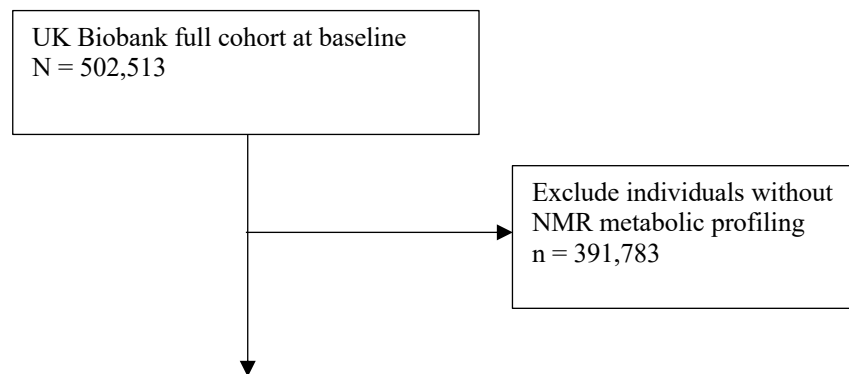

### Association of metabolites with red meat consumption and with IHD mortality

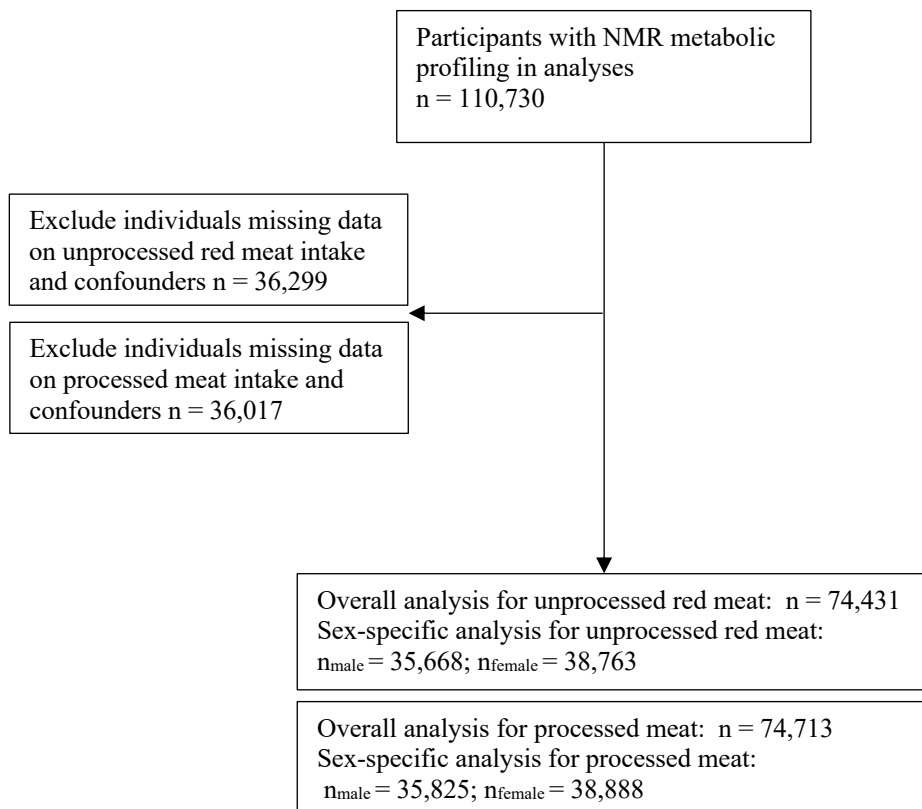

Supplement: s1 [file s1]
