# Supplementary figures and images for: Exploration of Metabolic Biomarkers Linking Red Meat Consumption to Ischemic Heart Disease Mortality in the UK Biobank
Source: MDPI journal article supplement (doi:10.3390/nu15081865), 2023-04-13

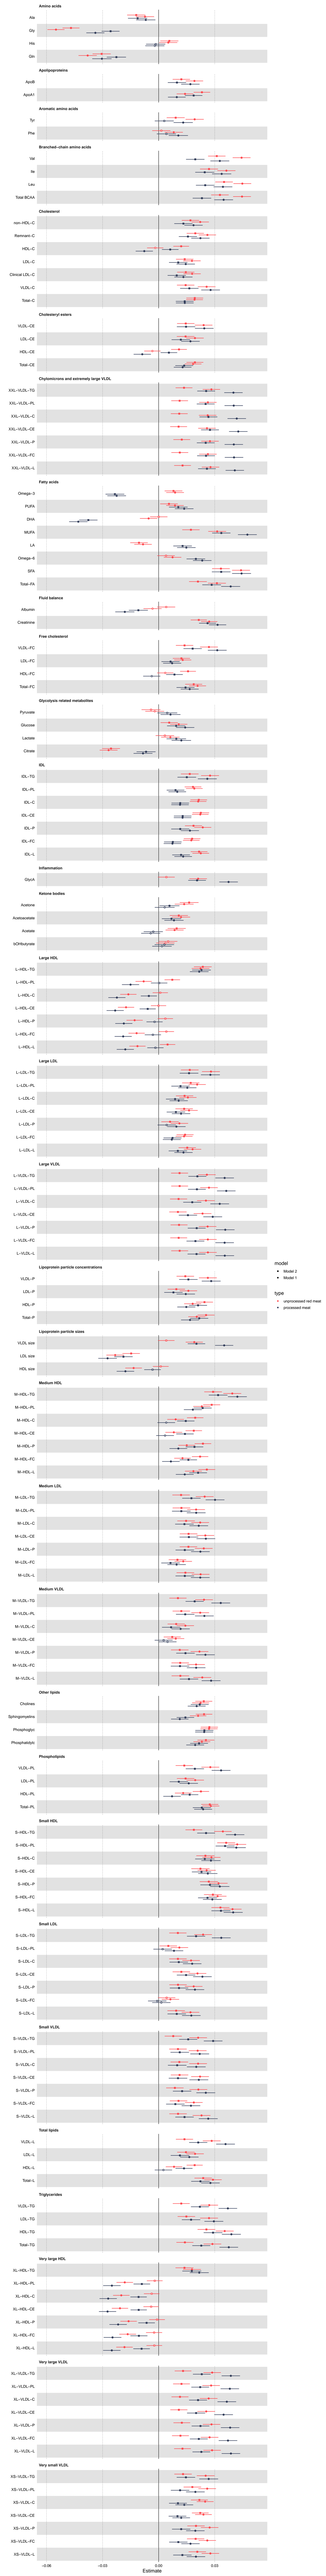

Supplement: s1 [file s1]
